# Supplementary material for: High-quality single-crystalline BiSe topological insulator nanowires and nanobelts grown via chemical vapor deposition
Source: Royal Society of Chemistry journal article supplement (doi:10.1039/d5ce00089k), 2025-01-01
Supplement: d5ce00089k1.pdf [file d5ce00089k1.pdf]

## Supplementary information

### **High-quality single-crystalline BiSe topological insulator nanowires and nanobelts grown by chemical vapor deposition**

Zhenyang Xuan<sup>a</sup>, Yongzhao Feng<sup>a</sup>, Boqin Song<sup>b</sup>, Tianping Ying<sup>b</sup>, Xiaofang Lai<sup>a</sup>, Jikang Jian<sup>a\*</sup>

*a.School of Physics and Optoelectronic Engineering, Guangdong University of Technology, Guangzhou 510006, China. Email address: [jianjikang@126.com](mailto:jianjikang@126.com)*

*b.Beijing National Laboratory for Condensed Matter Physics, Institute of Physics, Chinese Academy of Sciences, Beijing 100190, China.*

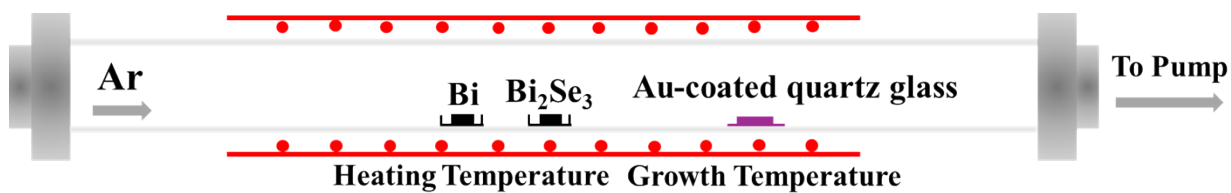

**Fig. S1.** Schematic diagram of the tube furnace used for the synthesis of BiSe nanowires and the CVD method.

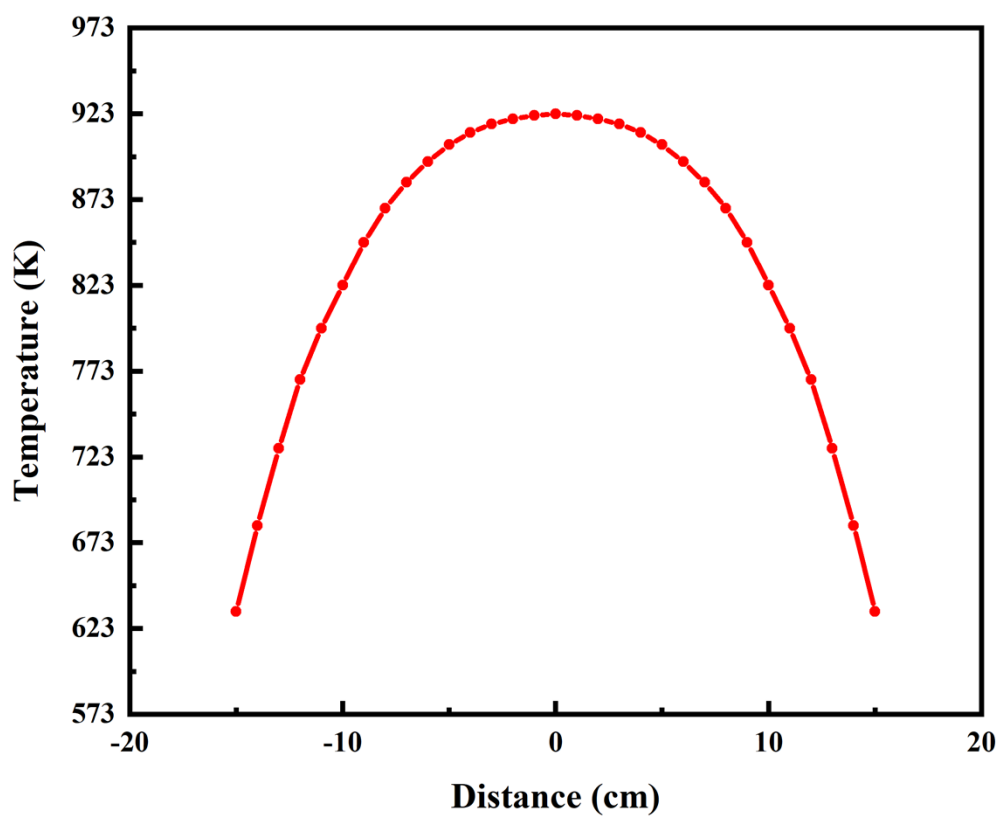

**Fig. S2.** Temperature distribution curve of tube furnace

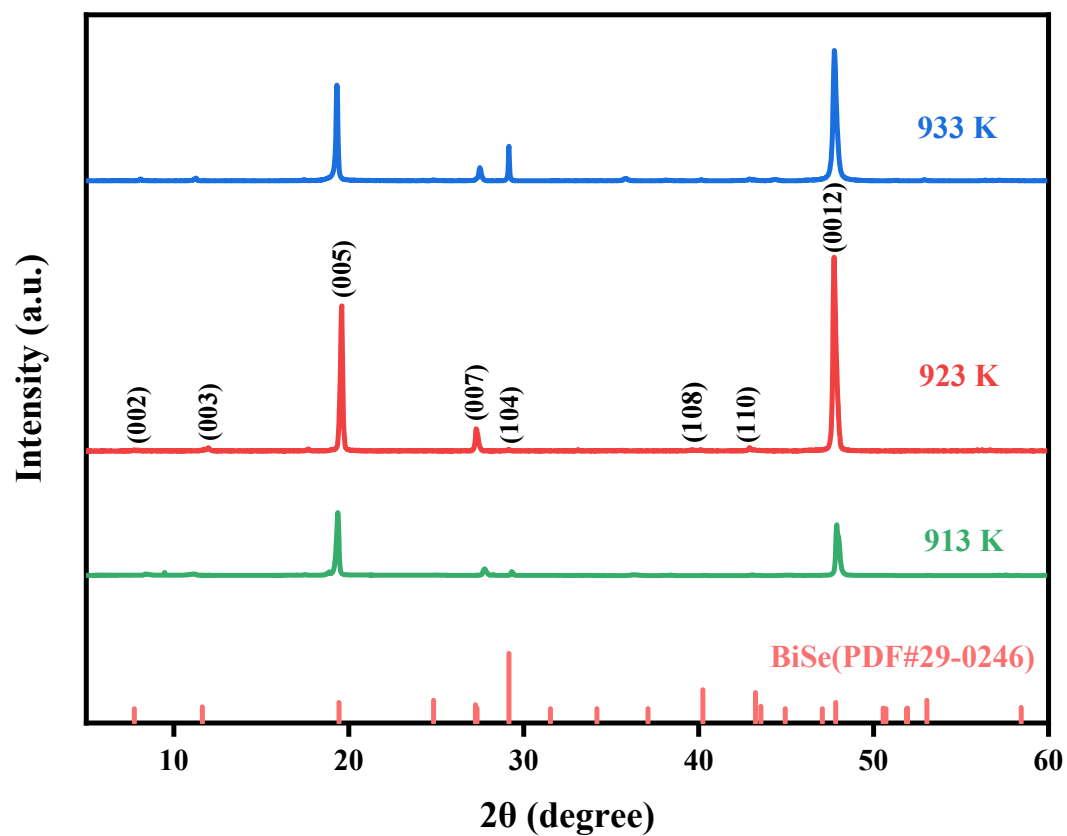

**Fig. S3.** XRD patterns of BiSe nanowires obtained at different heating temperatures.
